# Supplementary material for: Mechanochemical Synthesis of TiO2-CeO2 Mixed Oxides Utilized as a Screen-Printed Sensing Material for Oxygen Sensor
Source: MDPI journal article supplement (doi:10.3390/s23031313), 2023-01-24
Supplement: s1 [file s1]

## Supplementary Materials

### 2.2.2. Scanning Electron Microscopy of a film surface

The following SEM images were acquired using a Hitachi Regulus 8220 Scanning Electron Microscope (Mito, Japan).

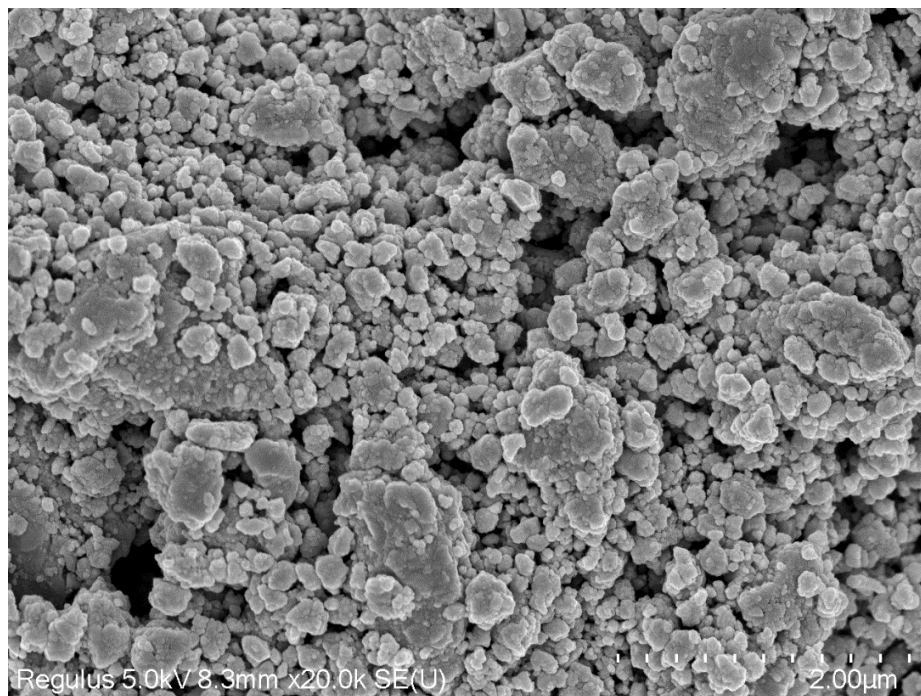

**Figure S1.** SEM image of the TiCe-0.8:0.2-40 sample at the center of the paste region.

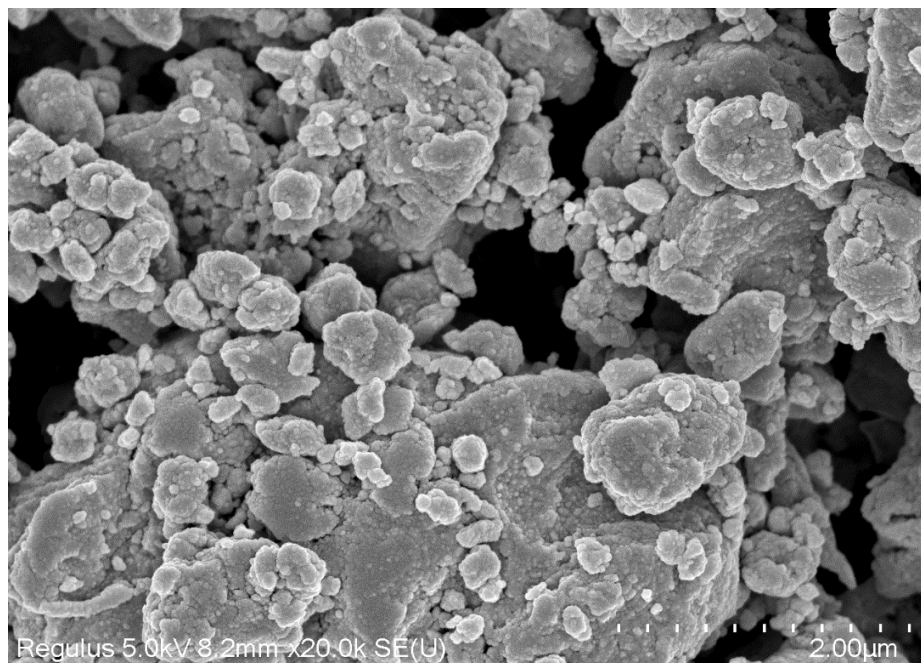

**Figure S2.** SEM image of the TiCe-0.2:0.8-40 sample at the center of the paste region.

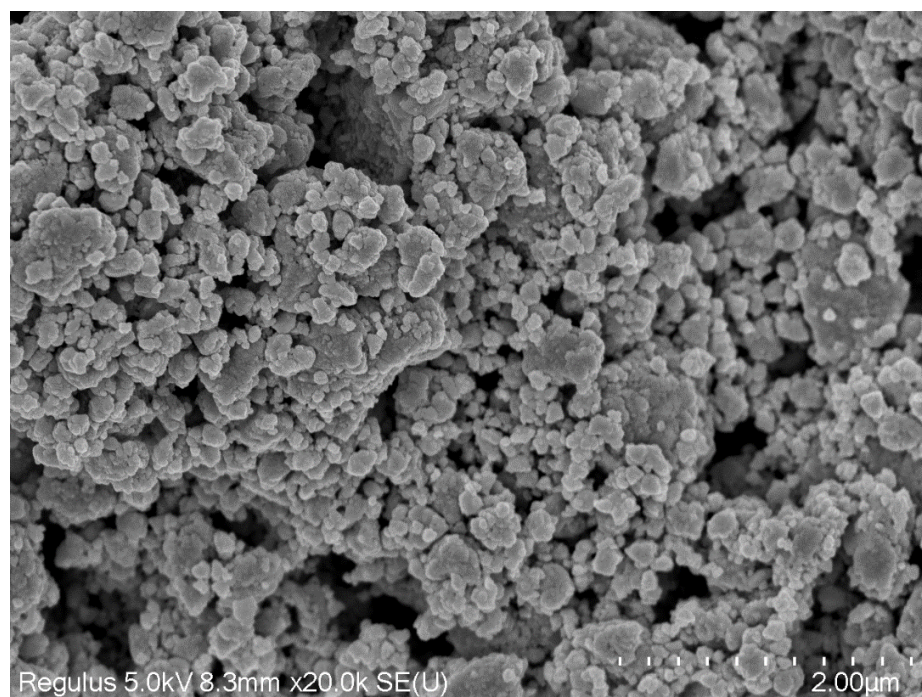

**Figure S3.** SEM image of the TiCe-0.8:0.2-100 sample at the center of the paste region.

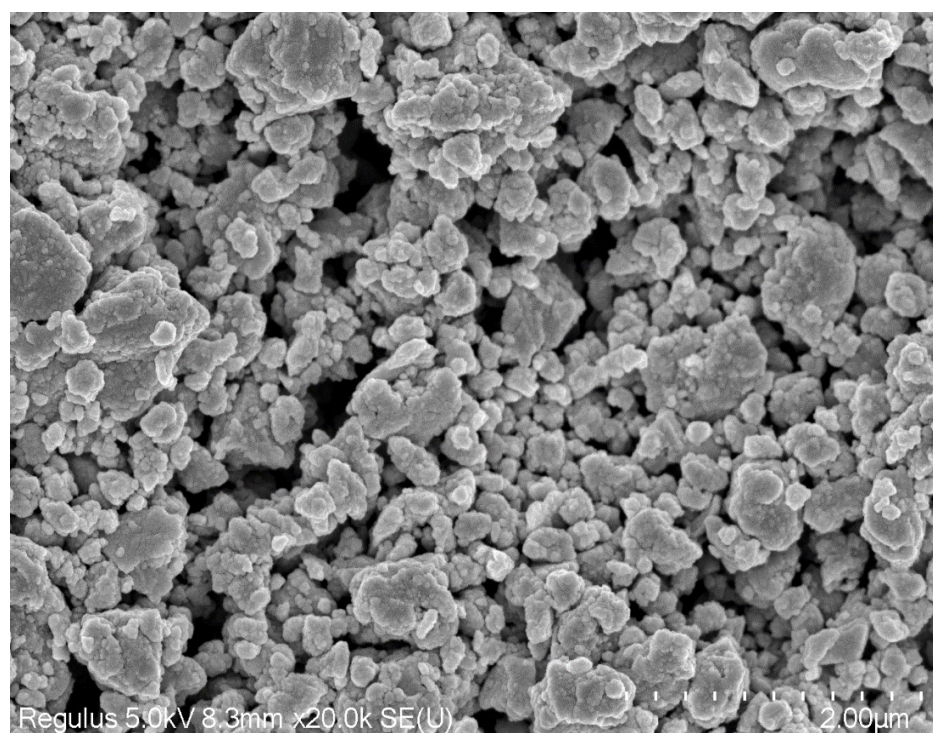

**Figure S4.** SEM image of the TiCe-0.2:0.8-100 sample at the center of the paste region.



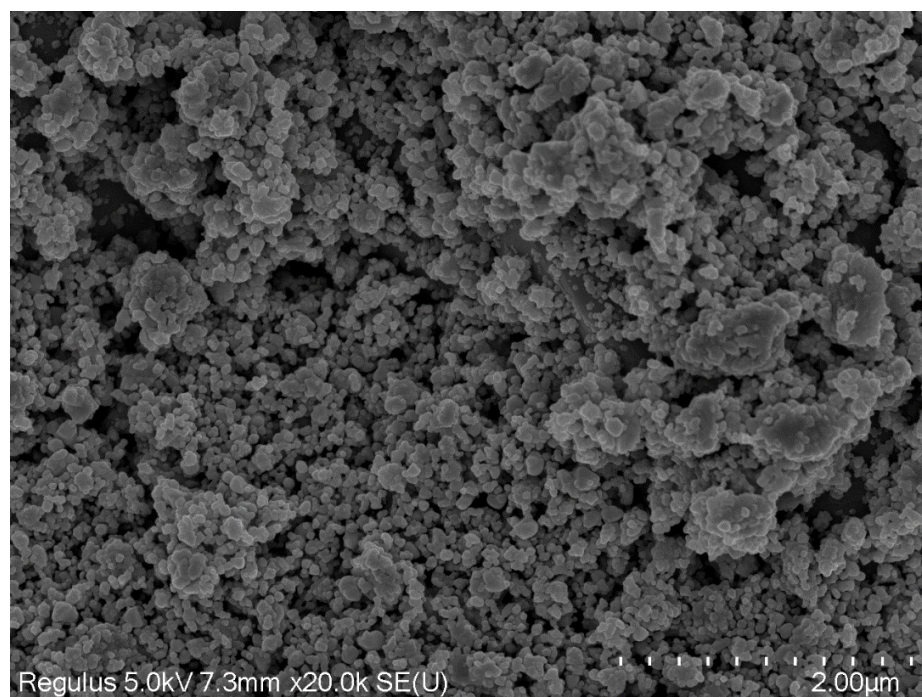

**Figure S5.** SEM image of the TiCe-0.5:0.5-100 sample at the center of the paste region.
